# Supplementary material for: Micronutrients and cognitive functions among urban school-going children and adolescents: A cross-sectional multicentric study from India
Source: PubMed Central journal article supplement (PMC9894395; doi:10.1371/journal.pone.0281247), 2023-02-02
Supplement: pone.0281247.s001.pdf [file pone.0281247.s001.pdf]

| <b>S1 Table: Distribution of performance of participants in various cognitive tests by micronutrient levels</b> |                                         |                         |                          |                         |                         |         |
|-----------------------------------------------------------------------------------------------------------------|-----------------------------------------|-------------------------|--------------------------|-------------------------|-------------------------|---------|
|                                                                                                                 | Classification of cognitive performance |                         |                          |                         |                         | p-value |
|                                                                                                                 | Borderline                              | Dull normal             | Average                  | Above-average           | Superior                |         |
| <b>Levels of micronutrients [n, median (IQR)]</b>                                                               |                                         |                         |                          |                         |                         |         |
| <i>Calcium (mg/dl)</i>                                                                                          |                                         |                         |                          |                         |                         |         |
| CPM/SPM                                                                                                         | 142, 10.0 (8.7-11.4)                    | 560, 9.7 (8.6-10.8)     | 1114, 9.6 (8.7-10.6)     | 318, 9.8 (9.0-10.6)     | 128, 9.8 (8.9-10.3)     | 0.12    |
| Coding Test                                                                                                     | 237, 9.4 (8.0-10.4)                     | 263, 9.7 (8.6-10.8)     | 984, 9.6 (8.7-10.7)      | 372, 9.7 (8.9-10.7)     | 406, 9.7 (8.9-10.7)     | 0.02    |
| Digit Span                                                                                                      | 524, 9.5 (8.1-10.5)                     | 703, 9.6 (8.6-10.5)     | 828, 9.7 (8.9-10.9)      | 141, 10.0 (9.3-11.0)    | 66, 9.8 (8.8-11.8)      | <0.001  |
| Arithmetic                                                                                                      | 278, 9.8 (8.8-10.7)                     | 671, 9.6 (8.6-10.8)     | 1016, 9.6 (8.7-10.6)     | 191, 9.8 (8.9-11.2)     | 106, 9.7 (8.7-10.7)     | 0.20    |
| <i>Iron (µg/dl)</i>                                                                                             |                                         |                         |                          |                         |                         |         |
| CPM/SPM                                                                                                         | 143, 65.3 (44.8-85.4)                   | 558, 69.2 (47.9-92.1)   | 1117, 70.3 (51.0-92.0)   | 318, 72.4 (51.6-93.9)   | 127, 79.8 (57.4-99.3)   | 0.02    |
| Coding Test                                                                                                     | 237, 69.4 (48.8-92.0)                   | 262, 69.3 (47.2-87.2)   | 986, 70.3 (51.1-94.6)    | 372, 69.2 (48.4-90.8)   | 406, 73.2 (53.3-93.8)   | 0.28    |
| Digit Span                                                                                                      | 523, 68.6 (45.0-88.0)                   | 705, 69.5 (51.1-92.1)   | 826, 71.6 (50.8-95.0)    | 142, 74.6 (55.9-98.7)   | 67, 77.9 (53.8-95.0)    | 0.04    |
| Arithmetic                                                                                                      | 277, 67.1 (45.4-87.5)                   | 671, 69.1 (50.0-90.6)   | 1017, 71.5 (51.1-94.0)   | 193, 75.5 (53.8-96.0)   | 105, 74.4 (49.0-95.8)   | 0.04    |
| <i>Zinc (µg/dl)</i>                                                                                             |                                         |                         |                          |                         |                         |         |
| CPM/SPM                                                                                                         | 114, 124.9 (97.7-158.0)                 | 499, 119.7 (94.2-157.8) | 1008, 116.7 (90.2-153.2) | 286, 118.9 (93.5-179.8) | 113, 127.5 (98.8-178.8) | 0.05    |
| Coding Test                                                                                                     | 206, 117.3 (96.9-160.5)                 | 245, 119.5 (90.5-150.1) | 881, 118.4 (90.9-159.1)  | 320, 120.3 (93.8-173.5) | 368, 118.3 (94.8-160.0) | 0.70    |
| Digit Span                                                                                                      | 465, 125.5 (96.9-164.3)                 | 629, 117.9 (93.4-161.2) | 750, 116.1 (87.8-155.9)  | 118, 111.9 (87.8-154.9) | 58, 116.1 (94.6-160.9)  | 0.03    |
| Arithmetic                                                                                                      | 242, 123.9 (95.7-159.7)                 | 605, 117.0 (91.1-159.1) | 902, 118.7 (93.6-159.0)  | 172, 118.2 (90.2-160.2) | 99, 115.4 (91.0-174.1)  | 0.84    |
| <i>Selenium (µg/dl)</i>                                                                                         |                                         |                         |                          |                         |                         |         |
| CPM/SPM                                                                                                         | 113, 10.4 (7.9-14.5)                    | 495, 11.6 (8.8-15.7)    | 997, 10.8 (7.6-14.9)     | 285, 11.1 (8.6-15.2)    | 113, 11.4 (8.4-17.5)    | <0.001  |
| Coding Test                                                                                                     | 205, 10.8 (8.5-15.7)                    | 242, 11.1 (7.9-15.7)    | 870, 11.2 (8.1-15.5)     | 316, 10.9 (7.9-14.2)    | 370, 11.2 (8.4-14.8)    | 0.56    |
| Digit Span                                                                                                      | 463, 11.9 (8.9-16.3)                    | 624, 11.3 (8.4-15.4)    | 741, 10.5 (7.6-14.5)     | 117, 9.9 (6.9-13.4)     | 58, 11.2 (8.8-15.5)     | <0.001  |
| Arithmetic                                                                                                      | 240, 11.2 (8.5-16.0)                    | 597, 11.0 (8.3-14.8)    | 897, 11.1 (8.1-15.5)     | 170, 11.0 (7.8-15.2)    | 99, 10.4 (7.7-15.1)     | 0.56    |
| <i>Vitamin A (µg/dl)</i>                                                                                        |                                         |                         |                          |                         |                         |         |
| CPM/SPM                                                                                                         | 140, 48.8 (37.2-62.9)                   | 549, 53.6 (36.7-76.5)   | 1116, 60.4 (42.2-89.6)   | 319, 67.5 (48.0-106.6)  | 126, 74.5 (56.6-123.8)  | <0.001  |
| Coding Test                                                                                                     | 235, 51.7 (36.7-82.3)                   | 258, 57.0 (41.5-88.8)   | 984, 60.6 (41.6-88.6)    | 365, 62.1 (45.1-94.7)   | 408, 58.2 (42.7-88.8)   | <0.001  |
| Digit Span                                                                                                      | 510, 53.3 (35.8-80.5)                   | 702, 59.1 (40.7-89.9)   | 829, 61.5 (45.3-91.3)    | 140, 63.4 (46.2-92.2)   | 69, 67.4 (47.7-94.8)    | <0.001  |
| Arithmetic                                                                                                      | 271, 58.7 (41.6-94.1)                   | 662, 58.3 (39.9-89.0)   | 1016, 59.5 (41.3-86.1)   | 196, 61.0 (43.4-90.3)   | 105, 65.1 (47.6-101.1)  | 0.23    |
| <i>Vitamin D (ng/ml)</i>                                                                                        |                                         |                         |                          |                         |                         |         |
| CPM/SPM                                                                                                         | 143, 12.0 (8.4-17.6)                    | 558, 13.9 (10.1-19.4)   | 1119, 13.6 (9.2-19.5)    | 319, 13.9 (9.8-18.8)    | 127, 15.7 (10.8-19.8)   | 0.02    |

|                            |                       |                       |                       |                       |                       |        |
|----------------------------|-----------------------|-----------------------|-----------------------|-----------------------|-----------------------|--------|
| Coding Test                | 238, 14.5 (9.8-20.6)  | 264, 13.8 (9.5-19.5)  | 987, 13.6 (9.6-19.3)  | 369, 13.5 (9.6-18.0)  | 408, 14.1 (10.0-18.7) | 0.47   |
| Digit Span                 | 523, 14.1 (10.0-19.6) | 708, 14.1 (9.9-20.1)  | 825, 13.2 (9.2-18.2)  | 142, 14.4 (9.7-19.1)  | 68, 14.4 (10.4-18.1)  | 0.03   |
| Arithmetic                 | 280, 13.0 (8.5-17.9)  | 668, 13.6 (10.0-18.7) | 1019, 14.1 (9.6-19.5) | 192, 14.3 (10.4-19.2) | 107, 14.7 (9.8-20.1)  | 0.09   |
| <i>Folate (ng/ml)</i>      |                       |                       |                       |                       |                       |        |
| CPM/SPM                    | 143, 3.8 (2.7-5.5)    | 560, 4.2 (3.1-6.1)    | 1124, 4.4 (3.2-6.2)   | 322, 4.1 (2.9-6.0)    | 127, 4.4 (3.3-5.9)    | 0.01   |
| Coding Test                | 240, 3.8 (2.8-5.5)    | 264, 4.1 (2.8-5.7)    | 992, 4.3 (3.2-6.1)    | 370, 4.4 (3.2-6.4)    | 410, 4.5 (3.2-6.5)    | <0.001 |
| Digit Span                 | 525, 4.2 (2.9-6.1)    | 710, 4.2 (3.1-6.0)    | 831, 4.3 (3.2-6.1)    | 141, 5.0 (3.5-6.6)    | 69, 4.6 (3.1-5.7)     | 0.03   |
| Arithmetic                 | 279, 3.9 (2.7-5.6)    | 674, 4.2 (3.0-5.6)    | 1020, 4.4 (3.2-6.4)   | 196, 4.7 (3.1-7.1)    | 107, 4.3 (3.3-6.5)    | <0.001 |
| <i>Vitamin B12 (pg/ml)</i> |                       |                       |                       |                       |                       |        |
| CPM/SPM                    | 142, 236 (174-341)    | 558, 215 (153-315)    | 1121, 257 (178-365)   | 321, 303 (220-445)    | 127, 392 (231-605)    | <0.001 |
| Coding Test                | 240, 233 (160-345)    | 263, 242 (164-354)    | 986, 249 (176-360)    | 370, 285 (186-413)    | 410, 272 (189-390)    | <0.001 |
| Digit Span                 | 524, 221 (157.5-323)  | 709, 257 (176-379)    | 826, 275 (195-389)    | 141, 274 (200-407)    | 69, 242 (177-358)     | <0.001 |
| Arithmetic                 | 278, 250 (177-350)    | 673, 246 (162-354)    | 1017, 252 (178-367)   | 194, 282.5 (204-409)  | 107, 326 (243-479)    | <0.001 |
