# Supplementary material for: Micronutrients and cognitive functions among urban school-going children and adolescents: A cross-sectional multicentric study from India
Source: PubMed Central journal article supplement (PMC9894395; doi:10.1371/journal.pone.0281247), 2023-02-02
Supplement: pone.0281247.s002.pdf [file pone.0281247.s002.pdf]

| <b>S2 Table: Association of different level of micronutrient deficiency with four cognitive tests.</b> |                   |                    |                |                      |                 |                |
|--------------------------------------------------------------------------------------------------------|-------------------|--------------------|----------------|----------------------|-----------------|----------------|
| <b>Micronutrient Deficiency<br/>m/n, %</b>                                                             | <b>Borderline</b> | <b>Dull normal</b> | <b>Average</b> | <b>Above average</b> | <b>Superior</b> | <b>p value</b> |
| <b>CPM/SPM test</b>                                                                                    |                   |                    |                |                      |                 |                |
| *No deficiency                                                                                         | 4/134, 3.0        | 26/134, 19.4       | 71/134, 53.0   | 22/134, 16.4         | 11/134, 8.2     | <b>0.03</b>    |
| Any one deficiency                                                                                     | 21/457, 4.6       | 100/457, 21.9      | 223/457, 48.8  | 80/457, 17.5         | 33/457, 7.2     |                |
| Two or more deficiency                                                                                 | 81/1327, 6.1      | 348/1327, 26.2     | 659/1327, 49.7 | 172/1327, 13.0       | 67/1327, 5.0    |                |
| <b>Coding test</b>                                                                                     |                   |                    |                |                      |                 |                |
| *No deficiency                                                                                         | 8/134, 6.0        | 13/134, 9.7        | 56/134, 41.8   | 23/134, 17.2         | 34/134, 25.4    | 0.08           |
| Any one deficiency                                                                                     | 49/457, 10.7      | 49/457, 10.7       | 187/457, 40.9  | 73/457, 16.0         | 99/457, 21.7    |                |
| Two or more deficiency                                                                                 | 136/1327, 10.2    | 169/1327, 12.7     | 594/1327, 44.8 | 208/1327, 15.7       | 220/1327, 16.6  |                |
| <b>Digit span test</b>                                                                                 |                   |                    |                |                      |                 |                |
| *No deficiency                                                                                         | 24/134, 17.9      | 38/134, 28.4       | 54/134, 40.3   | 14/134, 10.4         | 4/134, 3.0      | <b>0.001</b>   |
| Any one deficiency                                                                                     | 85/457, 18.6      | 143/457, 31.3      | 173/457, 37.9  | 38/457, 8.3          | 18/457, 3.9     |                |
| Two or more deficiency                                                                                 | 334/1327, 25.2    | 425/1327, 32.0     | 475/1327, 35.8 | 59/1327, 4.4         | 34/1327, 2.6    |                |
| <b>Arithmetic test</b>                                                                                 |                   |                    |                |                      |                 |                |
| *No deficiency                                                                                         | 9/134, 6.7        | 33/134, 24.6       | 78/134, 58.2   | 6/134, 4.5           | 8/134, 6.0      | <b>0.005</b>   |
| Any one deficiency                                                                                     | 51/457, 11.2      | 124/457, 27.1      | 207/457, 45.3  | 50/457, 10.9         | 25/457, 5.5     |                |
| Two or more deficiency                                                                                 | 174/1327, 13.1    | 417/1327, 31.4     | 572/1327, 43.1 | 104/1327, 7.8        | 60/1327, 4.5    |                |
| *Reference category are “No deficiency”                                                                |                   |                    |                |                      |                 |                |
